# Supplementary material for: Increased Matrix Metalloproteinases in Cerebrospinal Fluids of Patients With Major Depressive Disorder and Schizophrenia
Source: PubMed Central journal article supplement — Int J Neuropsychopharmacol. 2020 Jul 16;23(11):713–20. doi: 10.1093/ijnp/pyaa049 (PMC7745248; doi:10.1093/ijnp/pyaa049), 2020-07-16

# Supplementary Figure S1

## (A) CSF levels of TP

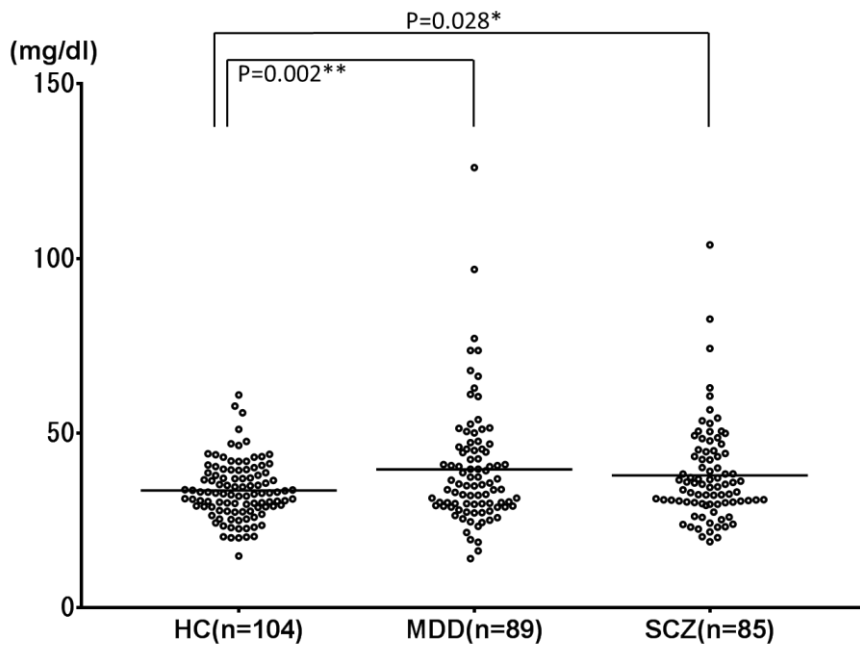

## (B) Correlation coefficients adjusted for age and sex

### 1) Between CSF levels of TP and HAMD scores in MDD (n=77)

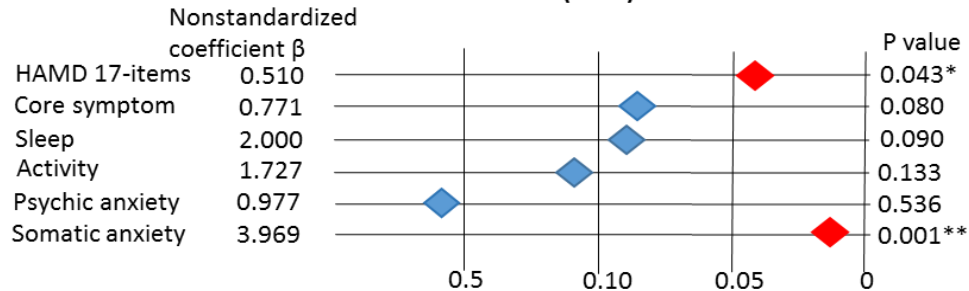

### 2) Between CSF levels of TP and PANSS scores in SCZ (n=78)

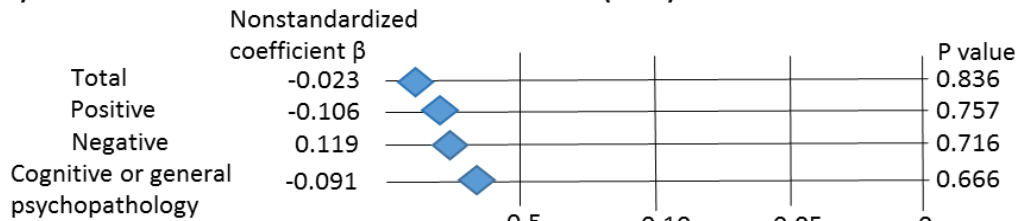

Supplement: pyaa049_suppl_supplementary_figure_s1.pdf [file pyaa049_suppl_supplementary_figure_s1.pdf]
